# Supplementary material for: Molecular Basis for Mambalgin-2 Interaction with Heterotrimeric α-ENaC/ASIC1a/γ-ENaC Channels in Cancer Cells
Source: MDPI journal article supplement (doi:10.3390/toxins15100612), 2023-10-13
Supplement: s1 [file s1]

Supplementary material

# Molecular Basis for Mambalgin-2 Interaction with Heterotrimeric $\alpha$ -ENaC/ASIC1a/ $\gamma$ -ENaC Channels in Cancer Cells

Ekaterina N. Lyukmanova <sup>1,2,3,4,\*</sup>, Maxim M. Zaigraev <sup>2,3,†</sup>, Dmitrii S. Kulbatskii <sup>2,†</sup>, Aizek B. Isaev <sup>2,3</sup>, Ilya D. Kukushkin <sup>2,3</sup>, Maxim L. Bychkov <sup>2</sup>, Mikhail A. Shulepko <sup>1</sup>, Anton O. Chugunov <sup>2,3</sup> and Mikhail P. Kirpichnikov <sup>2,4</sup>

<sup>1</sup> Faculty of Biology, MSU-BIT Shenzhen University, Shenzhen 518172, China; mikhailshulepko@yandex.ru

<sup>2</sup> Shemyakin-Ovchinnikov Institute of Bioorganic Chemistry, Russian Academy of Sciences, Miklukho-Maklaya 16/10, Moscow 117997, Russia; maximzaigraev@yandex.ru (M.M.Z.); d.kulbatskiy@gmail.com (D.S.K.); isaev.aizek@gmail.com (A.B.I.); ilya23kuku@gmail.com (I.D.K.); maksim.bychkov@gmail.com (M.L.B.); batch2k@yandex.ru (A.O.C.); kirpichnikov@inbox.ru (M.P.K.)

<sup>3</sup> Phystech School of Biological and Medical Physics, Moscow Institute of Physics and Technology (National Research University), Institutsky Lane 9, Dolgoprudny, Moscow 141701, Russia

<sup>4</sup> Interdisciplinary Scientific and Educational School of Moscow University «Molecular Technologies of the Living Systems and Synthetic Biology», Faculty of Biology, Lomonosov Moscow State University, Leninskie Gory, Moscow 119234, Russia

\* Correspondence: lyukmanova\_ekaterina@smbu.edu.cn

† These authors contributed equally to this work.

**Citation:** Lyukmanova, E.N.; Zaigraev, M.; Kulbatskii, D.; Isaev, I.; Kukushkin, I.; Bychkov, M.; Shulepko, M.; Chugunov, A.; Kirpichnikov, M. Molecular Basis for Mambalgin-2 Interaction with Heterotrimeric  $\alpha$ -ENaC/ASIC1a/ $\gamma$ -ENaC Channels in Cancer Cells. *Toxins* **2023**, *15*, 612. <https://doi.org/10.3390/toxins15100612>

Received: 8 September 2023

Revised: 30 September 2023

Accepted: 7 October 2023

Published: 13 October 2023

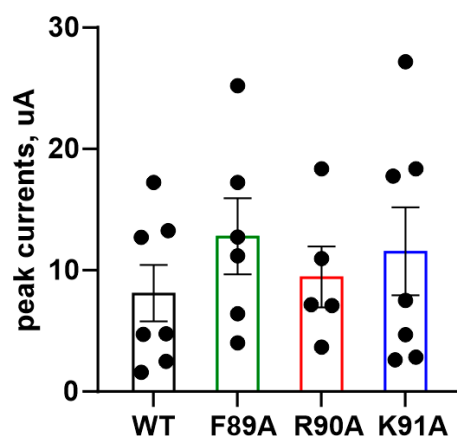

**Figure S1.** Scatter plot of peak current amplitudes for  $\alpha$ -ENaC/ASIC1a/ $\gamma$ -ENaC oocytes with WT, F89A, R90A, K91A  $\gamma$ -ENaC subunits. No statistically significant differences between means were detected by one-way ANOVA ( $F(3, 21) = 0.4985$ ,  $p = 0.6873$ ).

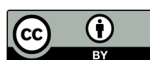

**Copyright:** © 2023 by the authors. Licensee MDPI, Basel, Switzerland. This article is an open access article distributed under the terms and conditions of the Creative Commons Attribution (CC BY) license (<https://creativecommons.org/licenses/by/4.0/>).

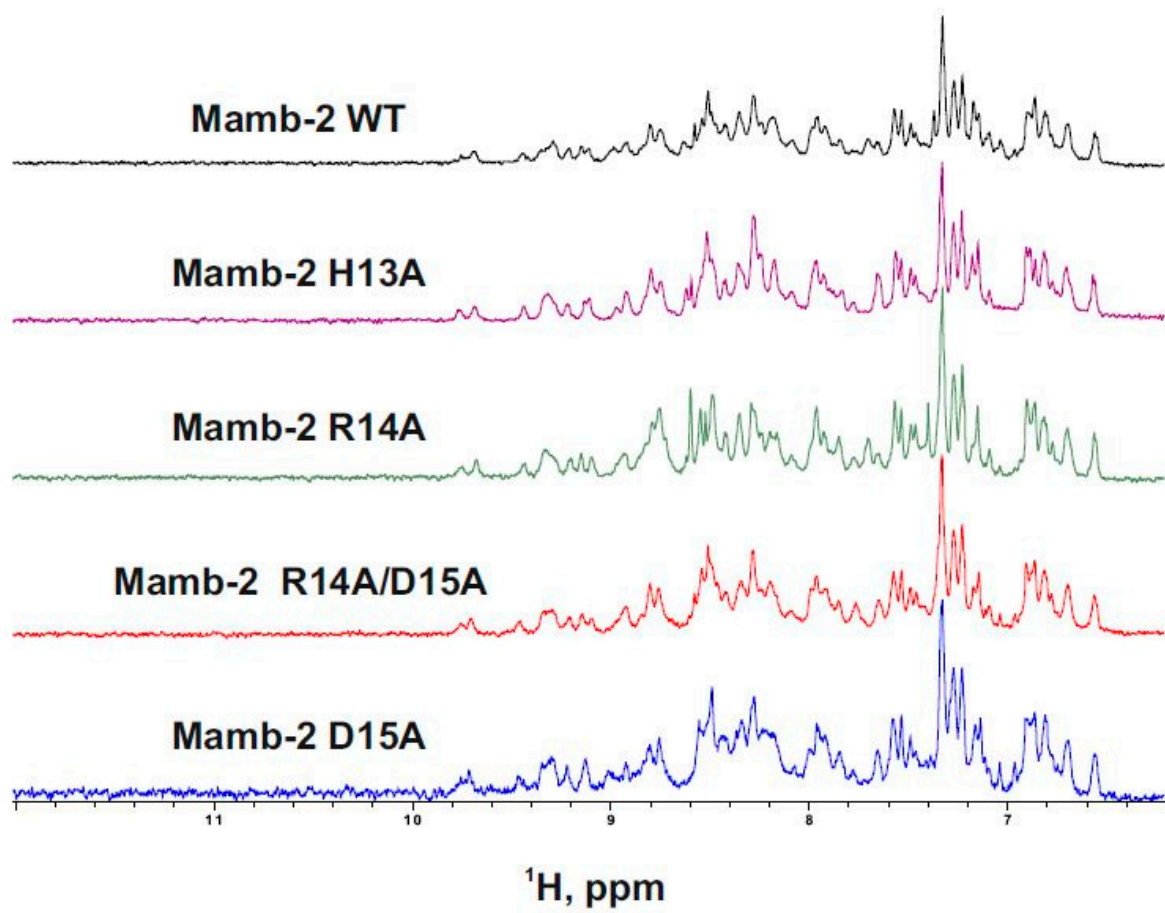

**Figure S2.** Amide regions of  $^1\text{H}$  1D NMR spectra of Mamb-2 variants (700 MHz, 30°C, pH 4.0).
